# Supplementary material for: Smoking and Diabetes: Is the Association Mediated by Adiponectin, Leptin, or C-reactive Protein?
Source: PubMed Central journal article supplement (PMC4310870; doi:10.2188/jea.je20140055), 2015-02-05
Supplement: je-25-099-s001.pdf [file je-25-099-s001.pdf]

喫煙による糖尿病リスクの上昇はアディポネクチン、レプチン、C反応性タンパクによって仲介されるか？

ヒラウイ H, イサヤス<sup>1,2</sup>, 八谷寛<sup>1,3</sup>, 李媛英<sup>3</sup>, 上村真由<sup>1</sup>, 王超辰<sup>1</sup>, 江啓発<sup>1</sup>, 豊嶋英明<sup>4</sup>, 玉腰浩司<sup>5</sup>, 張燕<sup>1</sup>, 川副延生<sup>1</sup>, 青山温子<sup>1</sup>

1 名古屋大学大学院医学系研究科国際保健医療学・公衆衛生学

2 エチオピア メケレ大学 公衆衛生学

3 藤田保健衛生大学医学部公衆衛生学

4 安城更生病院

5 名古屋大学大学院医学系研究科看護学専攻

背景：喫煙が2型糖尿病発症リスクに関連することはよく知られているが、そのメカニズムは十分解明されていない。そこで、その関連がアディポネクチン、レプチン、C反応タンパク（CRP）によって説明されるか検討した。

方法：愛知職域コホート（第2次）に参加した35-66歳の男性従業者3,338名を2002年から2011年まで追跡した。多変量調整Cox回帰モデルを用いてベースライン時喫煙状況の糖尿病発症に対するハザード比と95%信頼区間を計算した。喫煙が上記3つのバイオマーカーを介して糖尿病発症リスクに与える間接的な「影響」の大きさは多変量仲介モデルを用いて推定し、そのバイアス調整95%信頼区間（BC 95%CI）はブートストラップ法によって求めた。

結果：非喫煙者に比し、現喫煙者の糖尿病発症リスクは有意に高かった（ハザード比：1.75、95%CI：1.25-2.46）。喫煙の糖尿病発症に対するアディポネクチンを介する「影響」の大きさの推定値（BC 95%CI）は、軽度、中等度、重度の喫煙でそれぞれ0.033（0.005-0.082）、0.044（0.010-0.094）、0.054（0.013-0.113）であった。レプチンやCRPを介する影響は統計学的に有意ではなかった。

結論：喫煙の糖尿病発症に対する「影響」の一部はアディポネクチンによって仲介されていると考えられた。

キーワード：アディポネクチン；C反応タンパク；レプチン；仲介解析；喫煙，2型糖尿病
